# Supplementary figures and images for: The alleviative effects of viable and inactive Lactobacillus paracasei CCFM1120 against alcoholic liver disease via modulation of gut microbiota and the Nrf2/HO-1 and TLR4/MyD88/NF-κB pathways
Source: Royal Society of Chemistry journal article supplement (doi:10.1039/d4fo02592j), 2024-01-01

Figure.4D

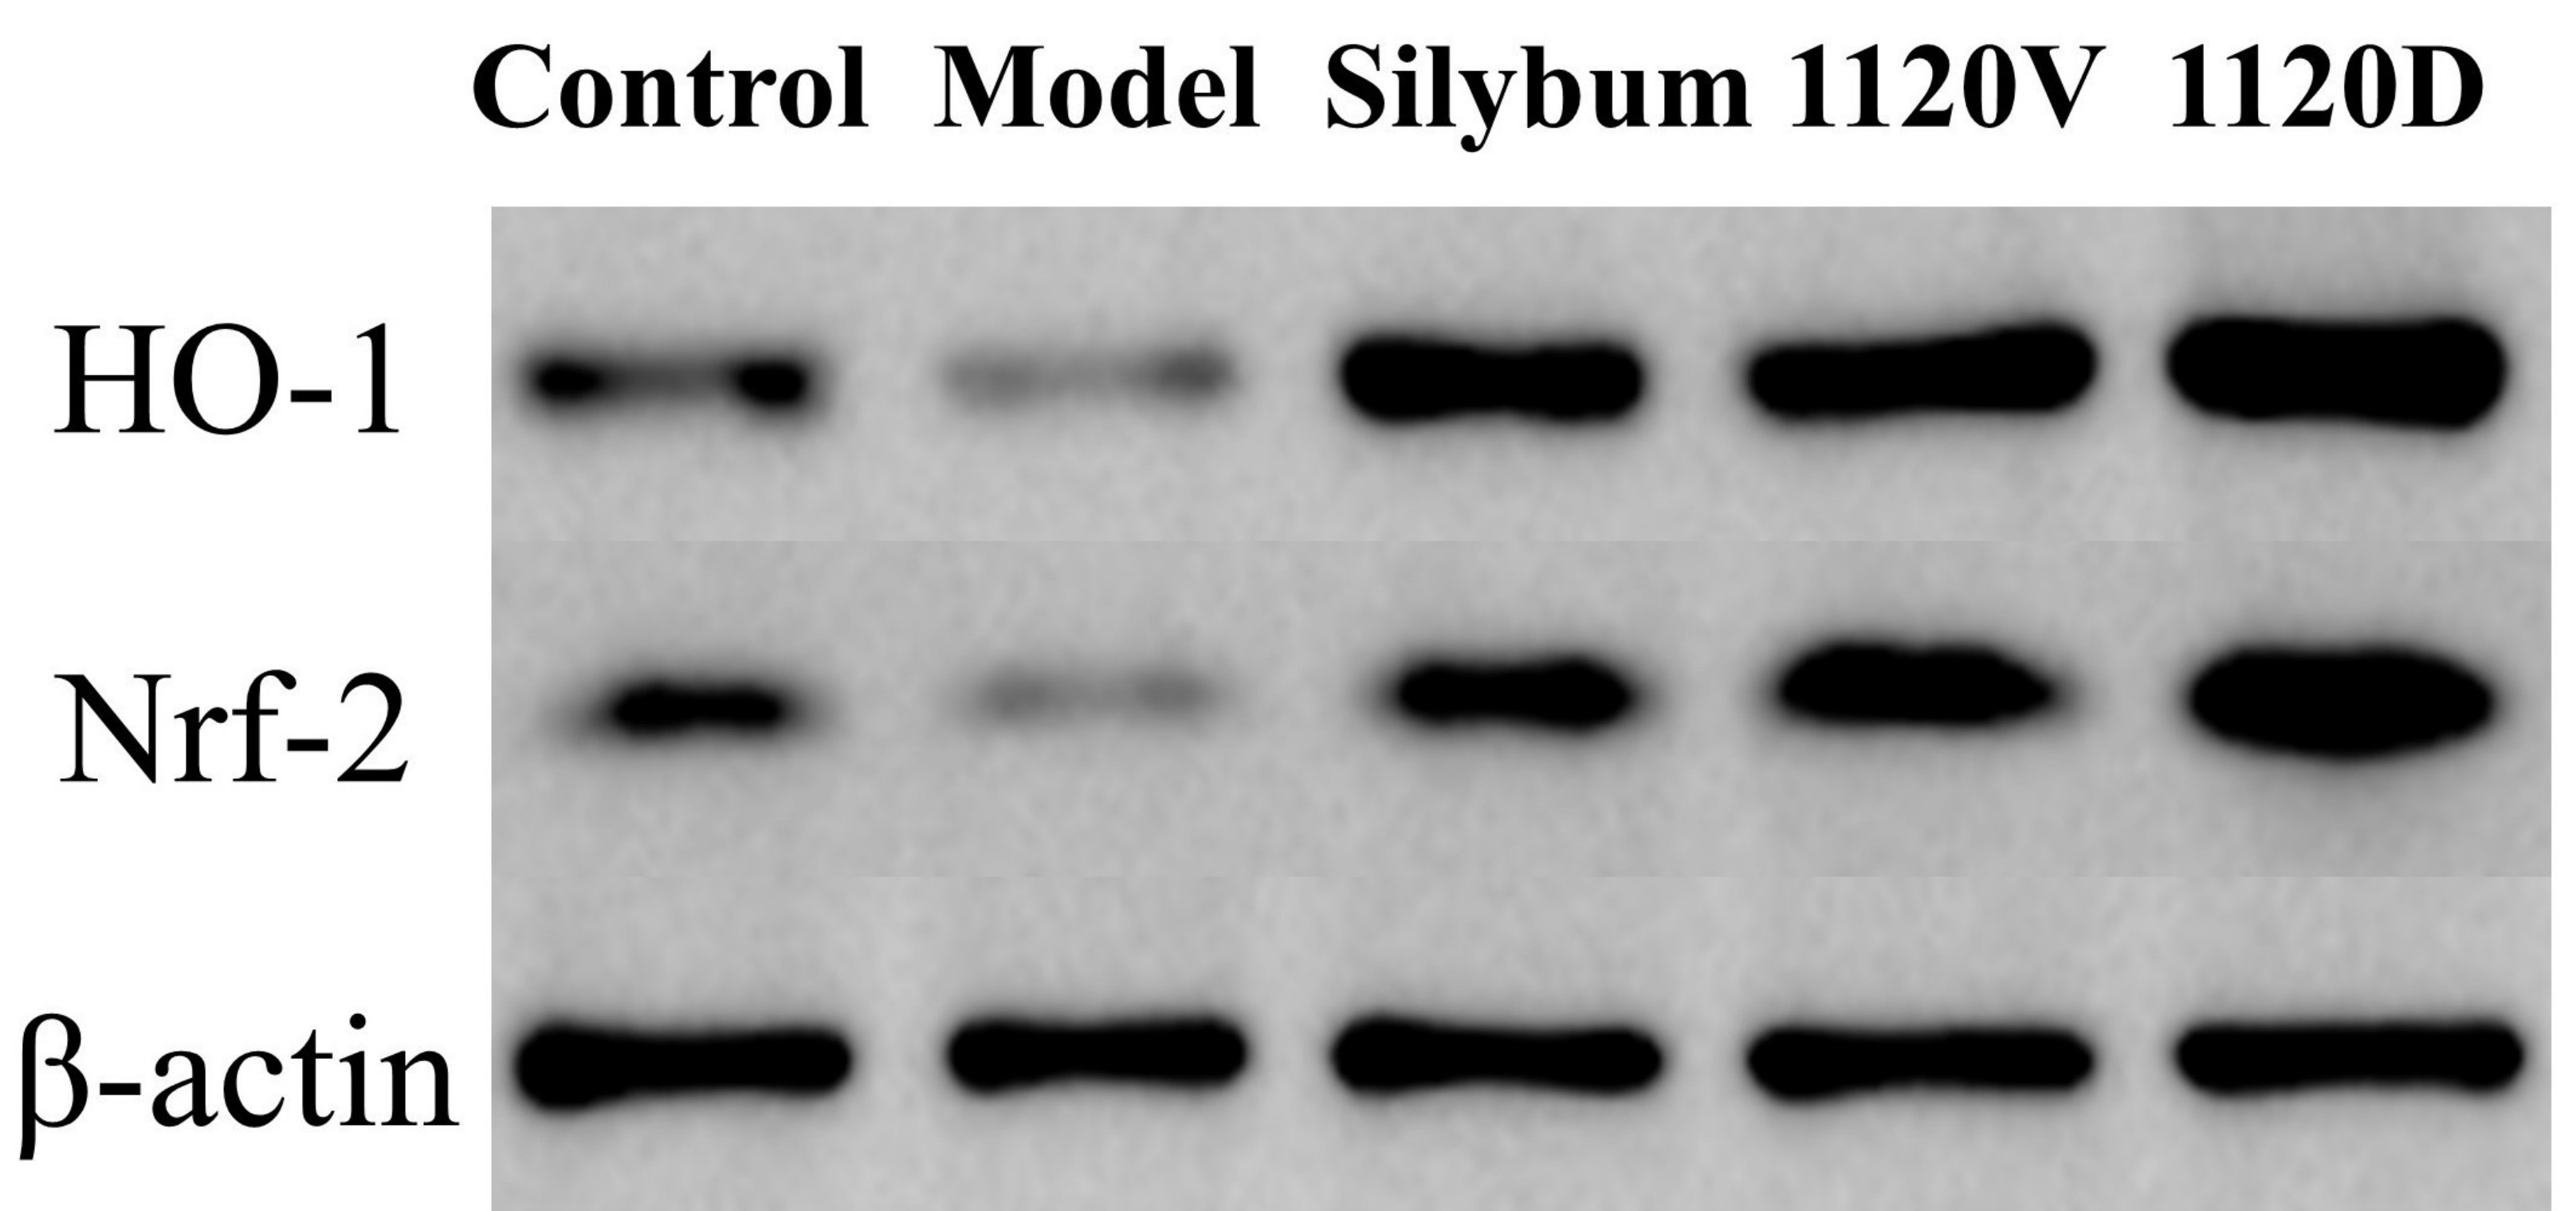

Unedited figures in figure 4D

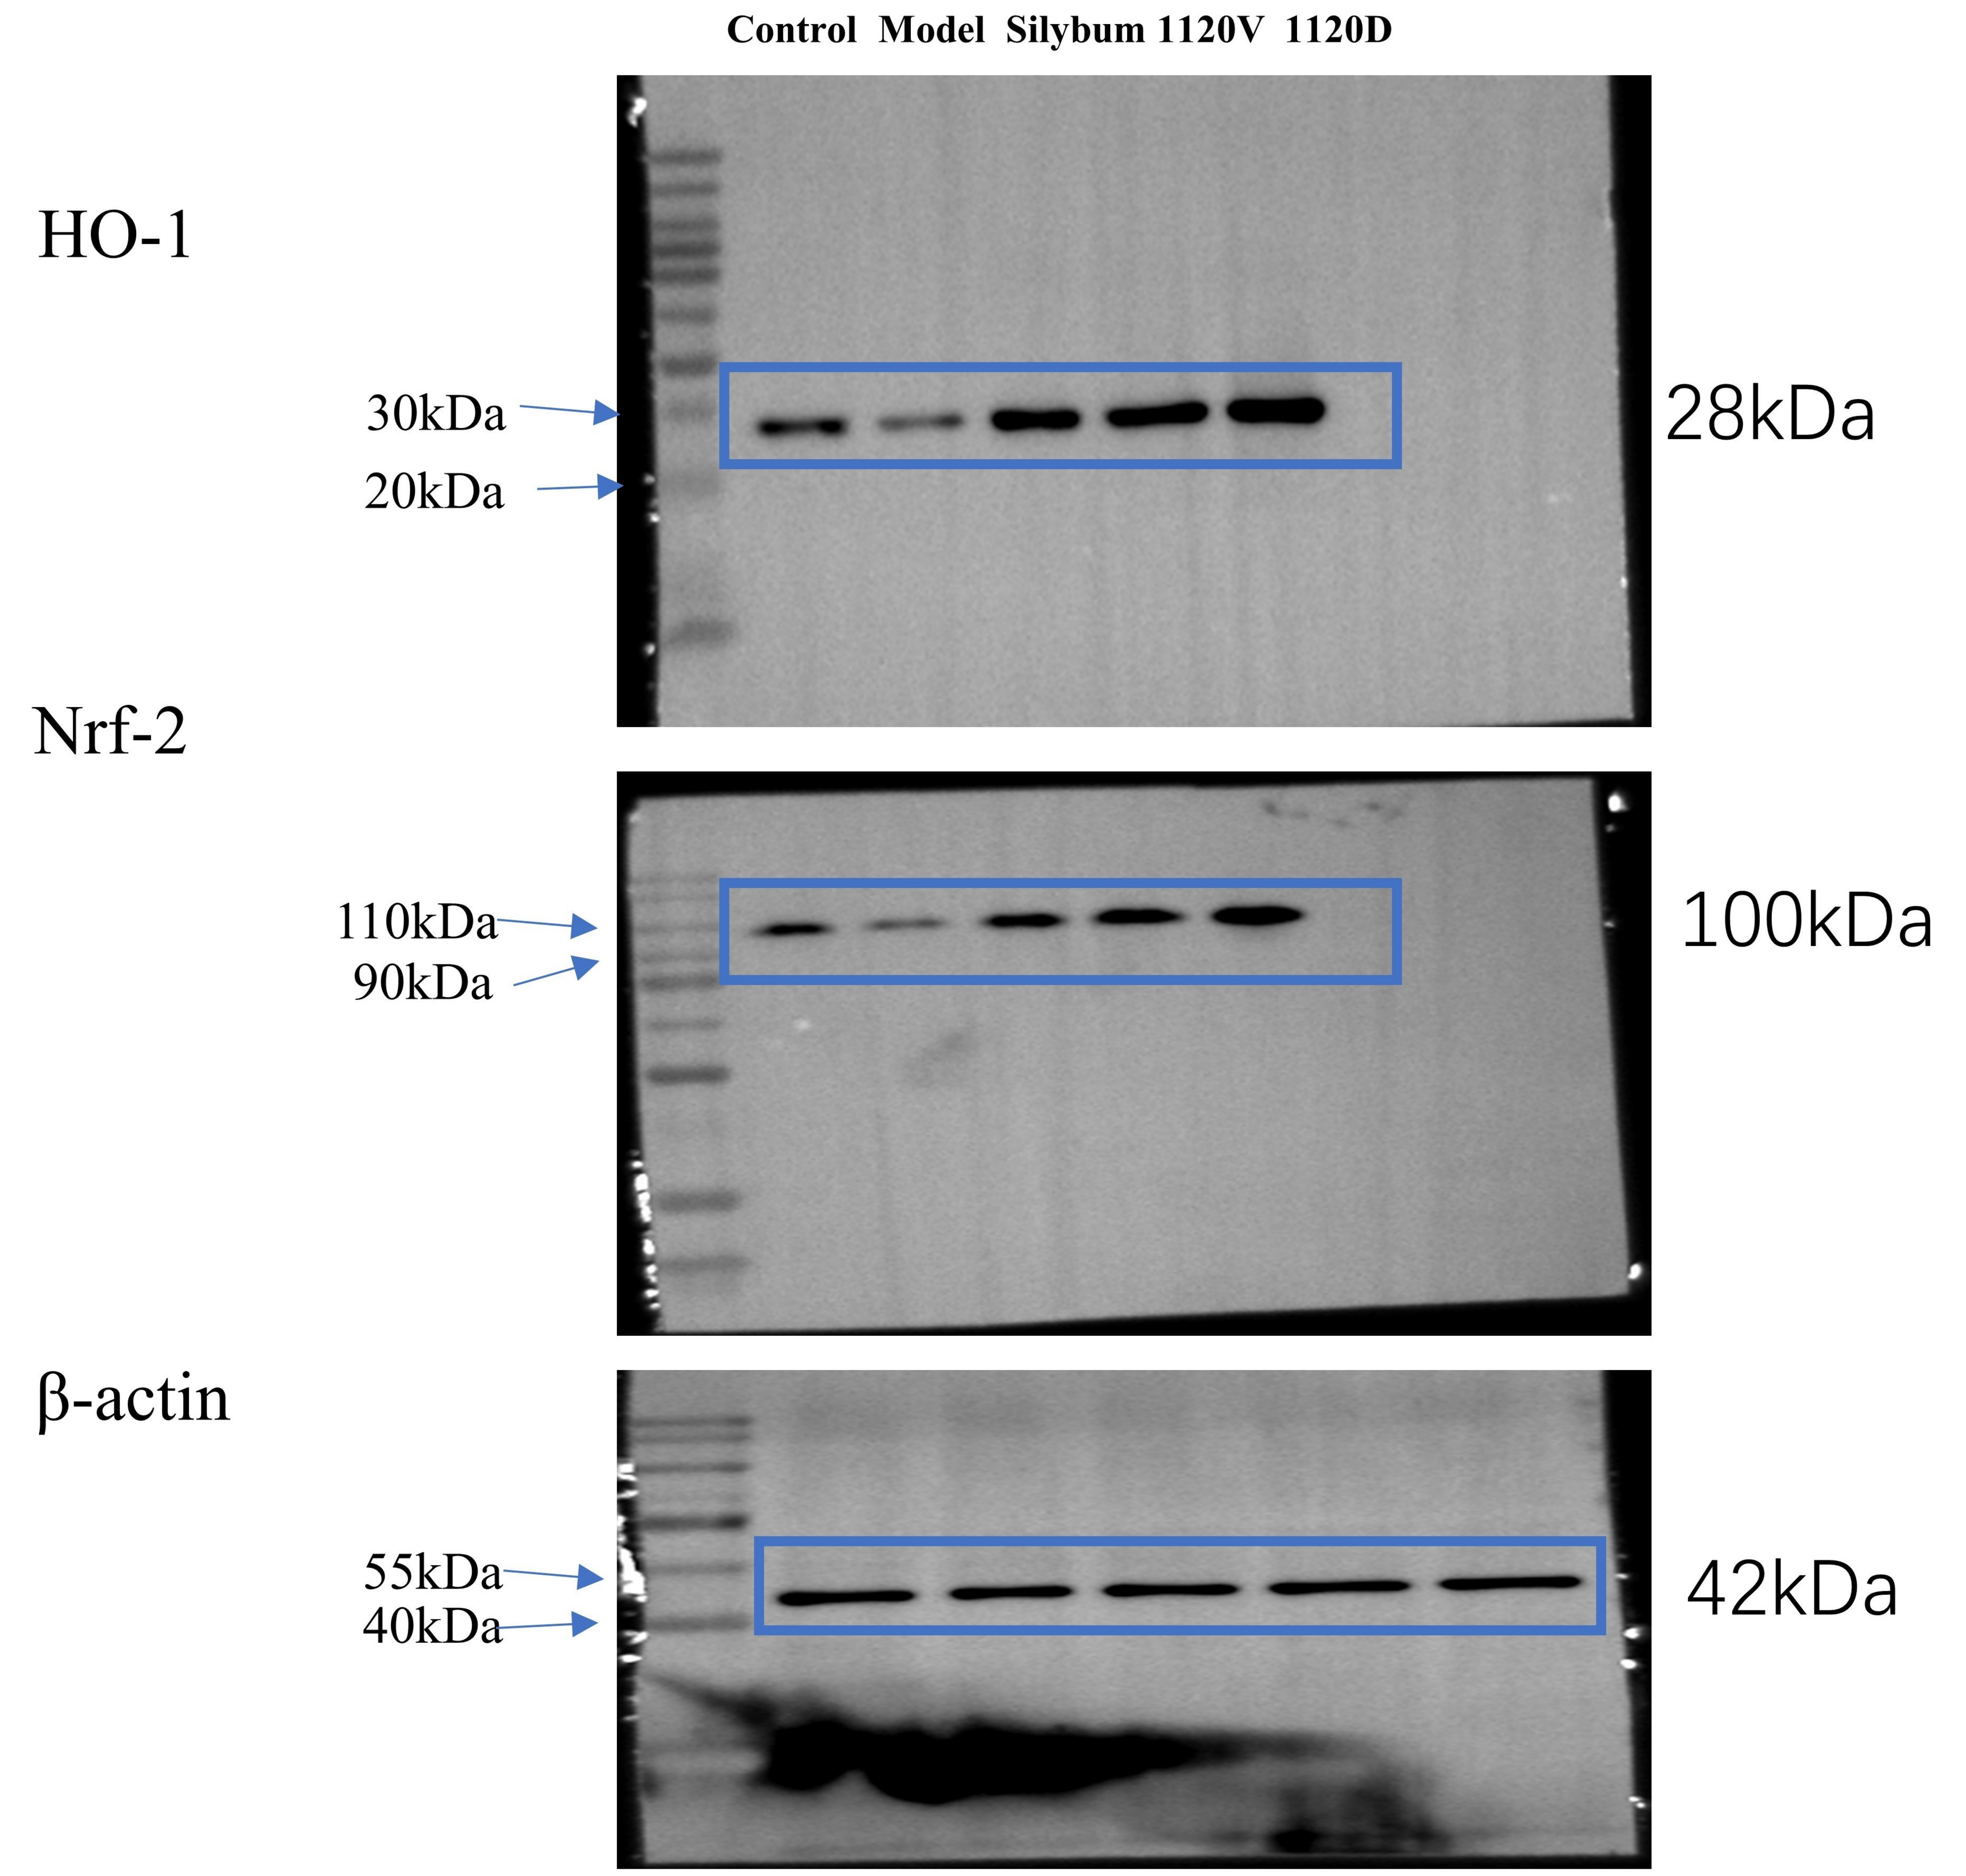

Supplement: d4fo02592j1.pdf [file d4fo02592j1.pdf]

Figure.6D

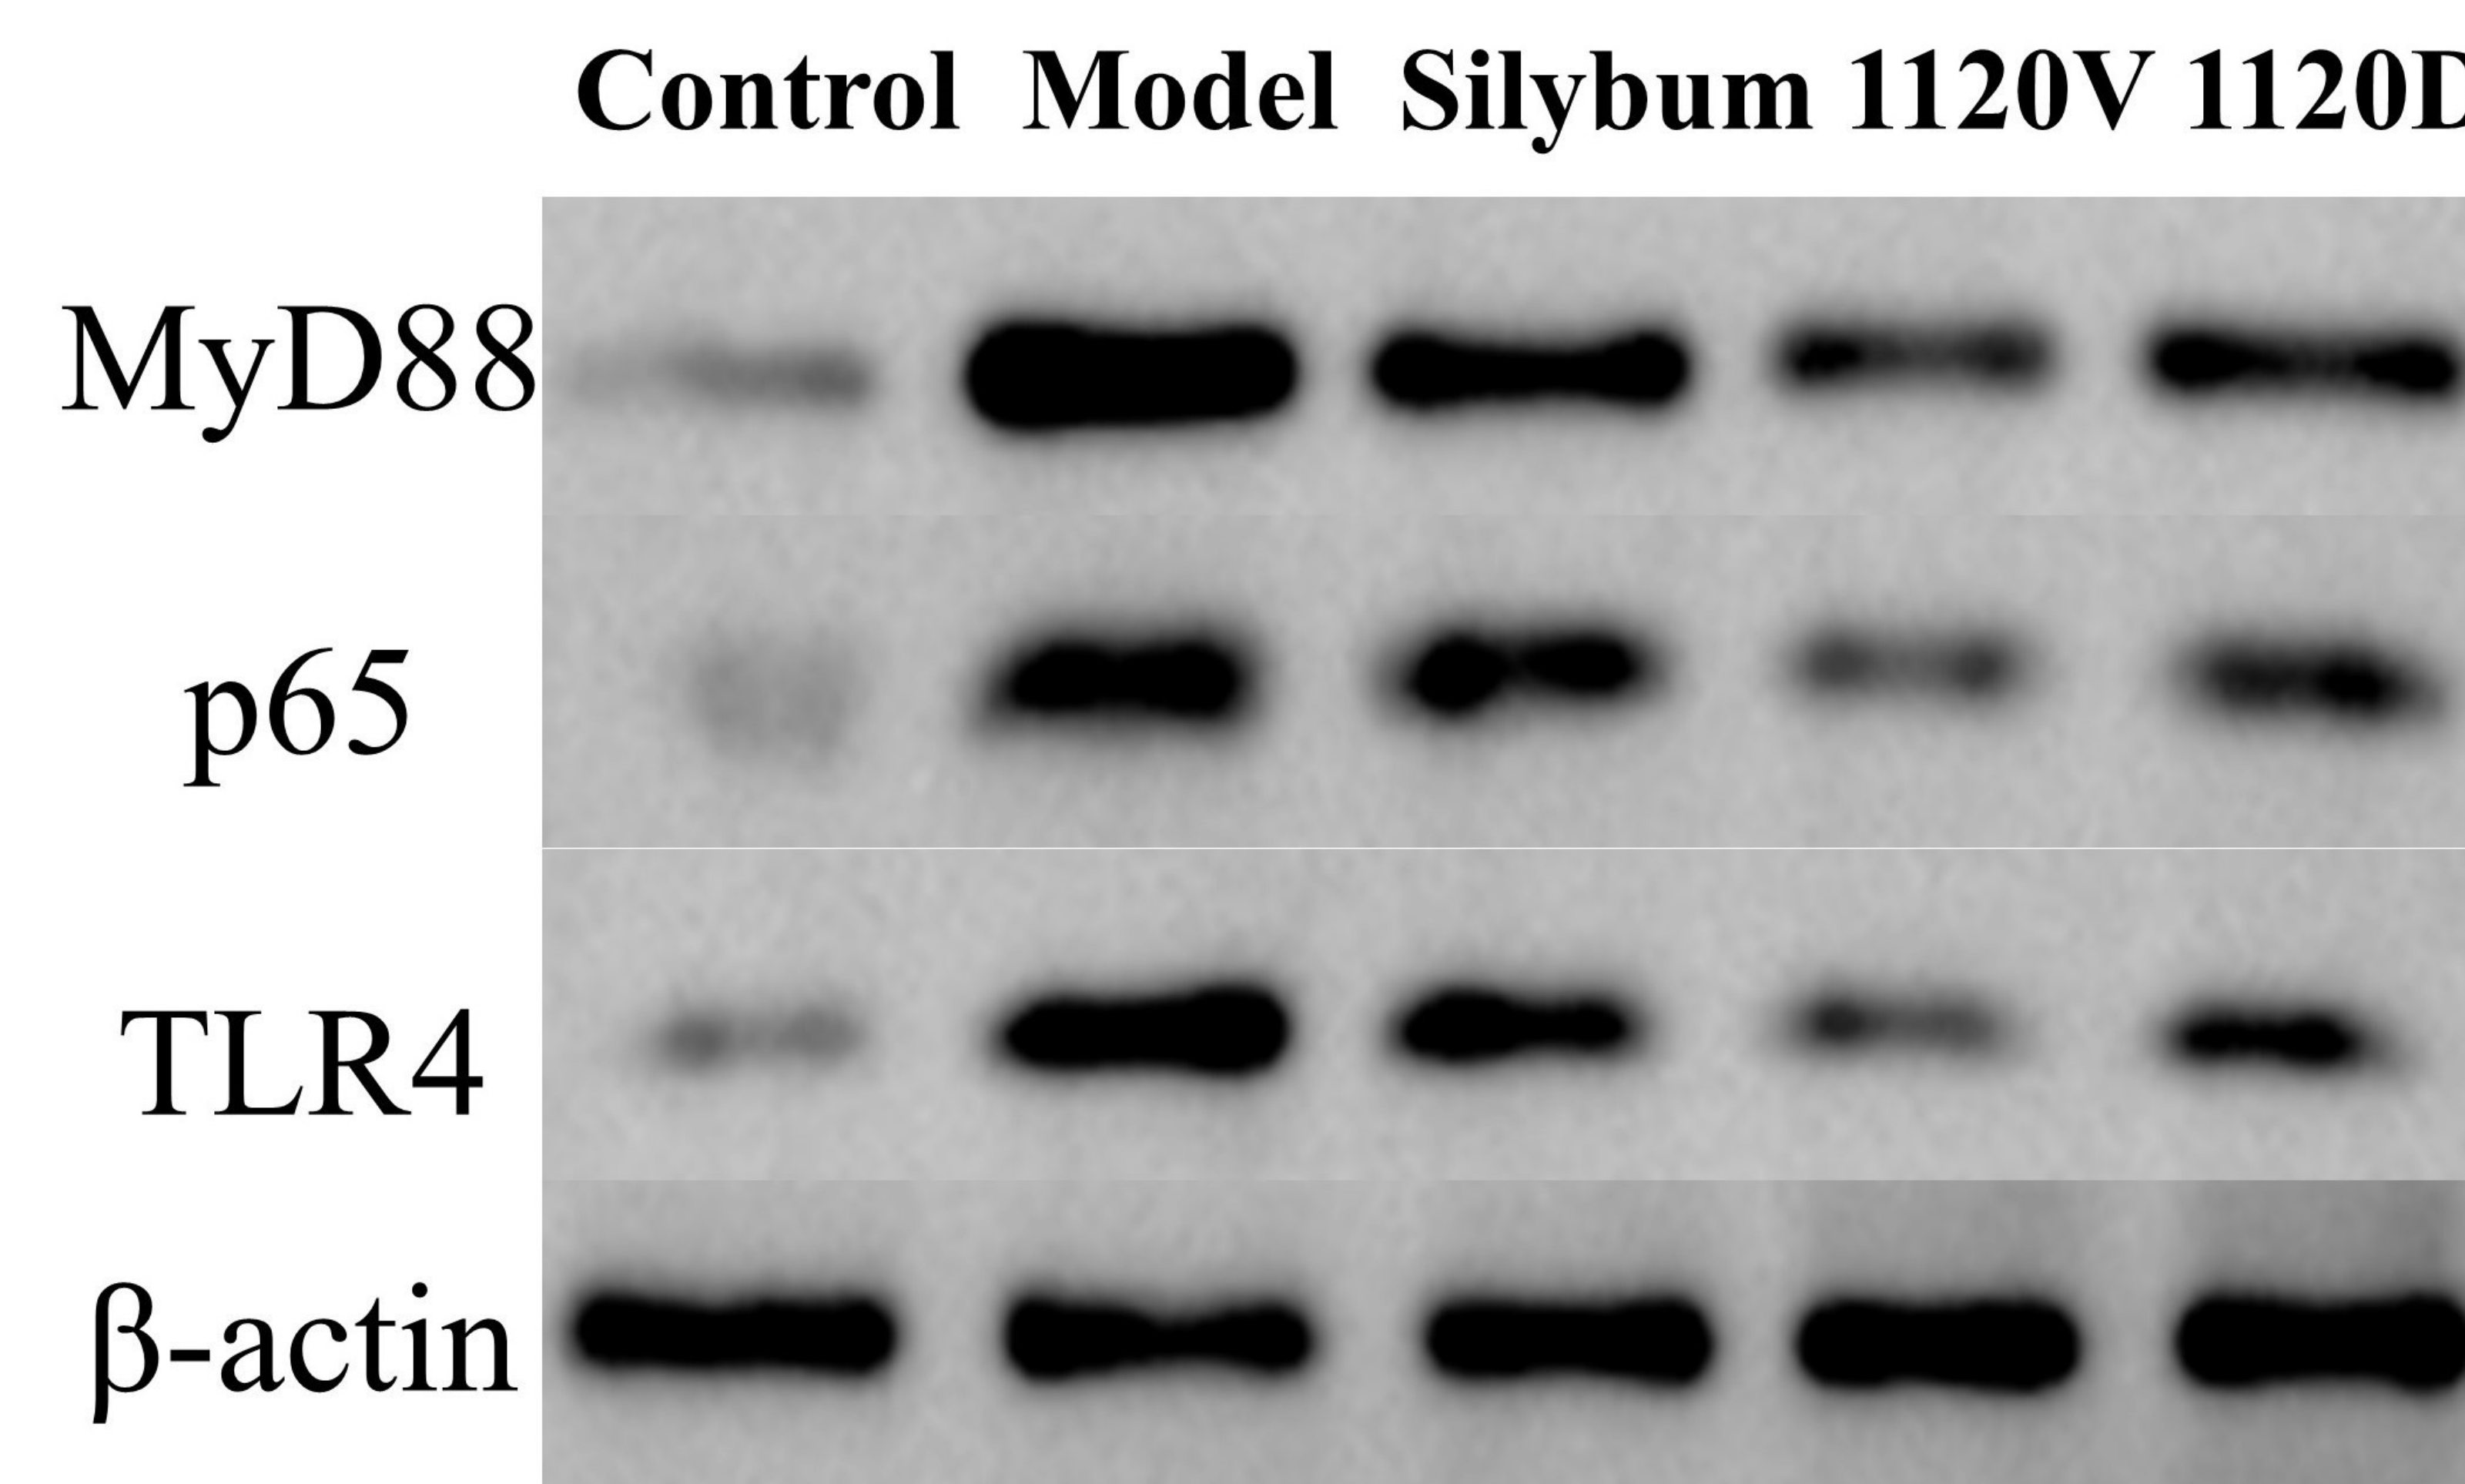

Unedited figures in figure 6D

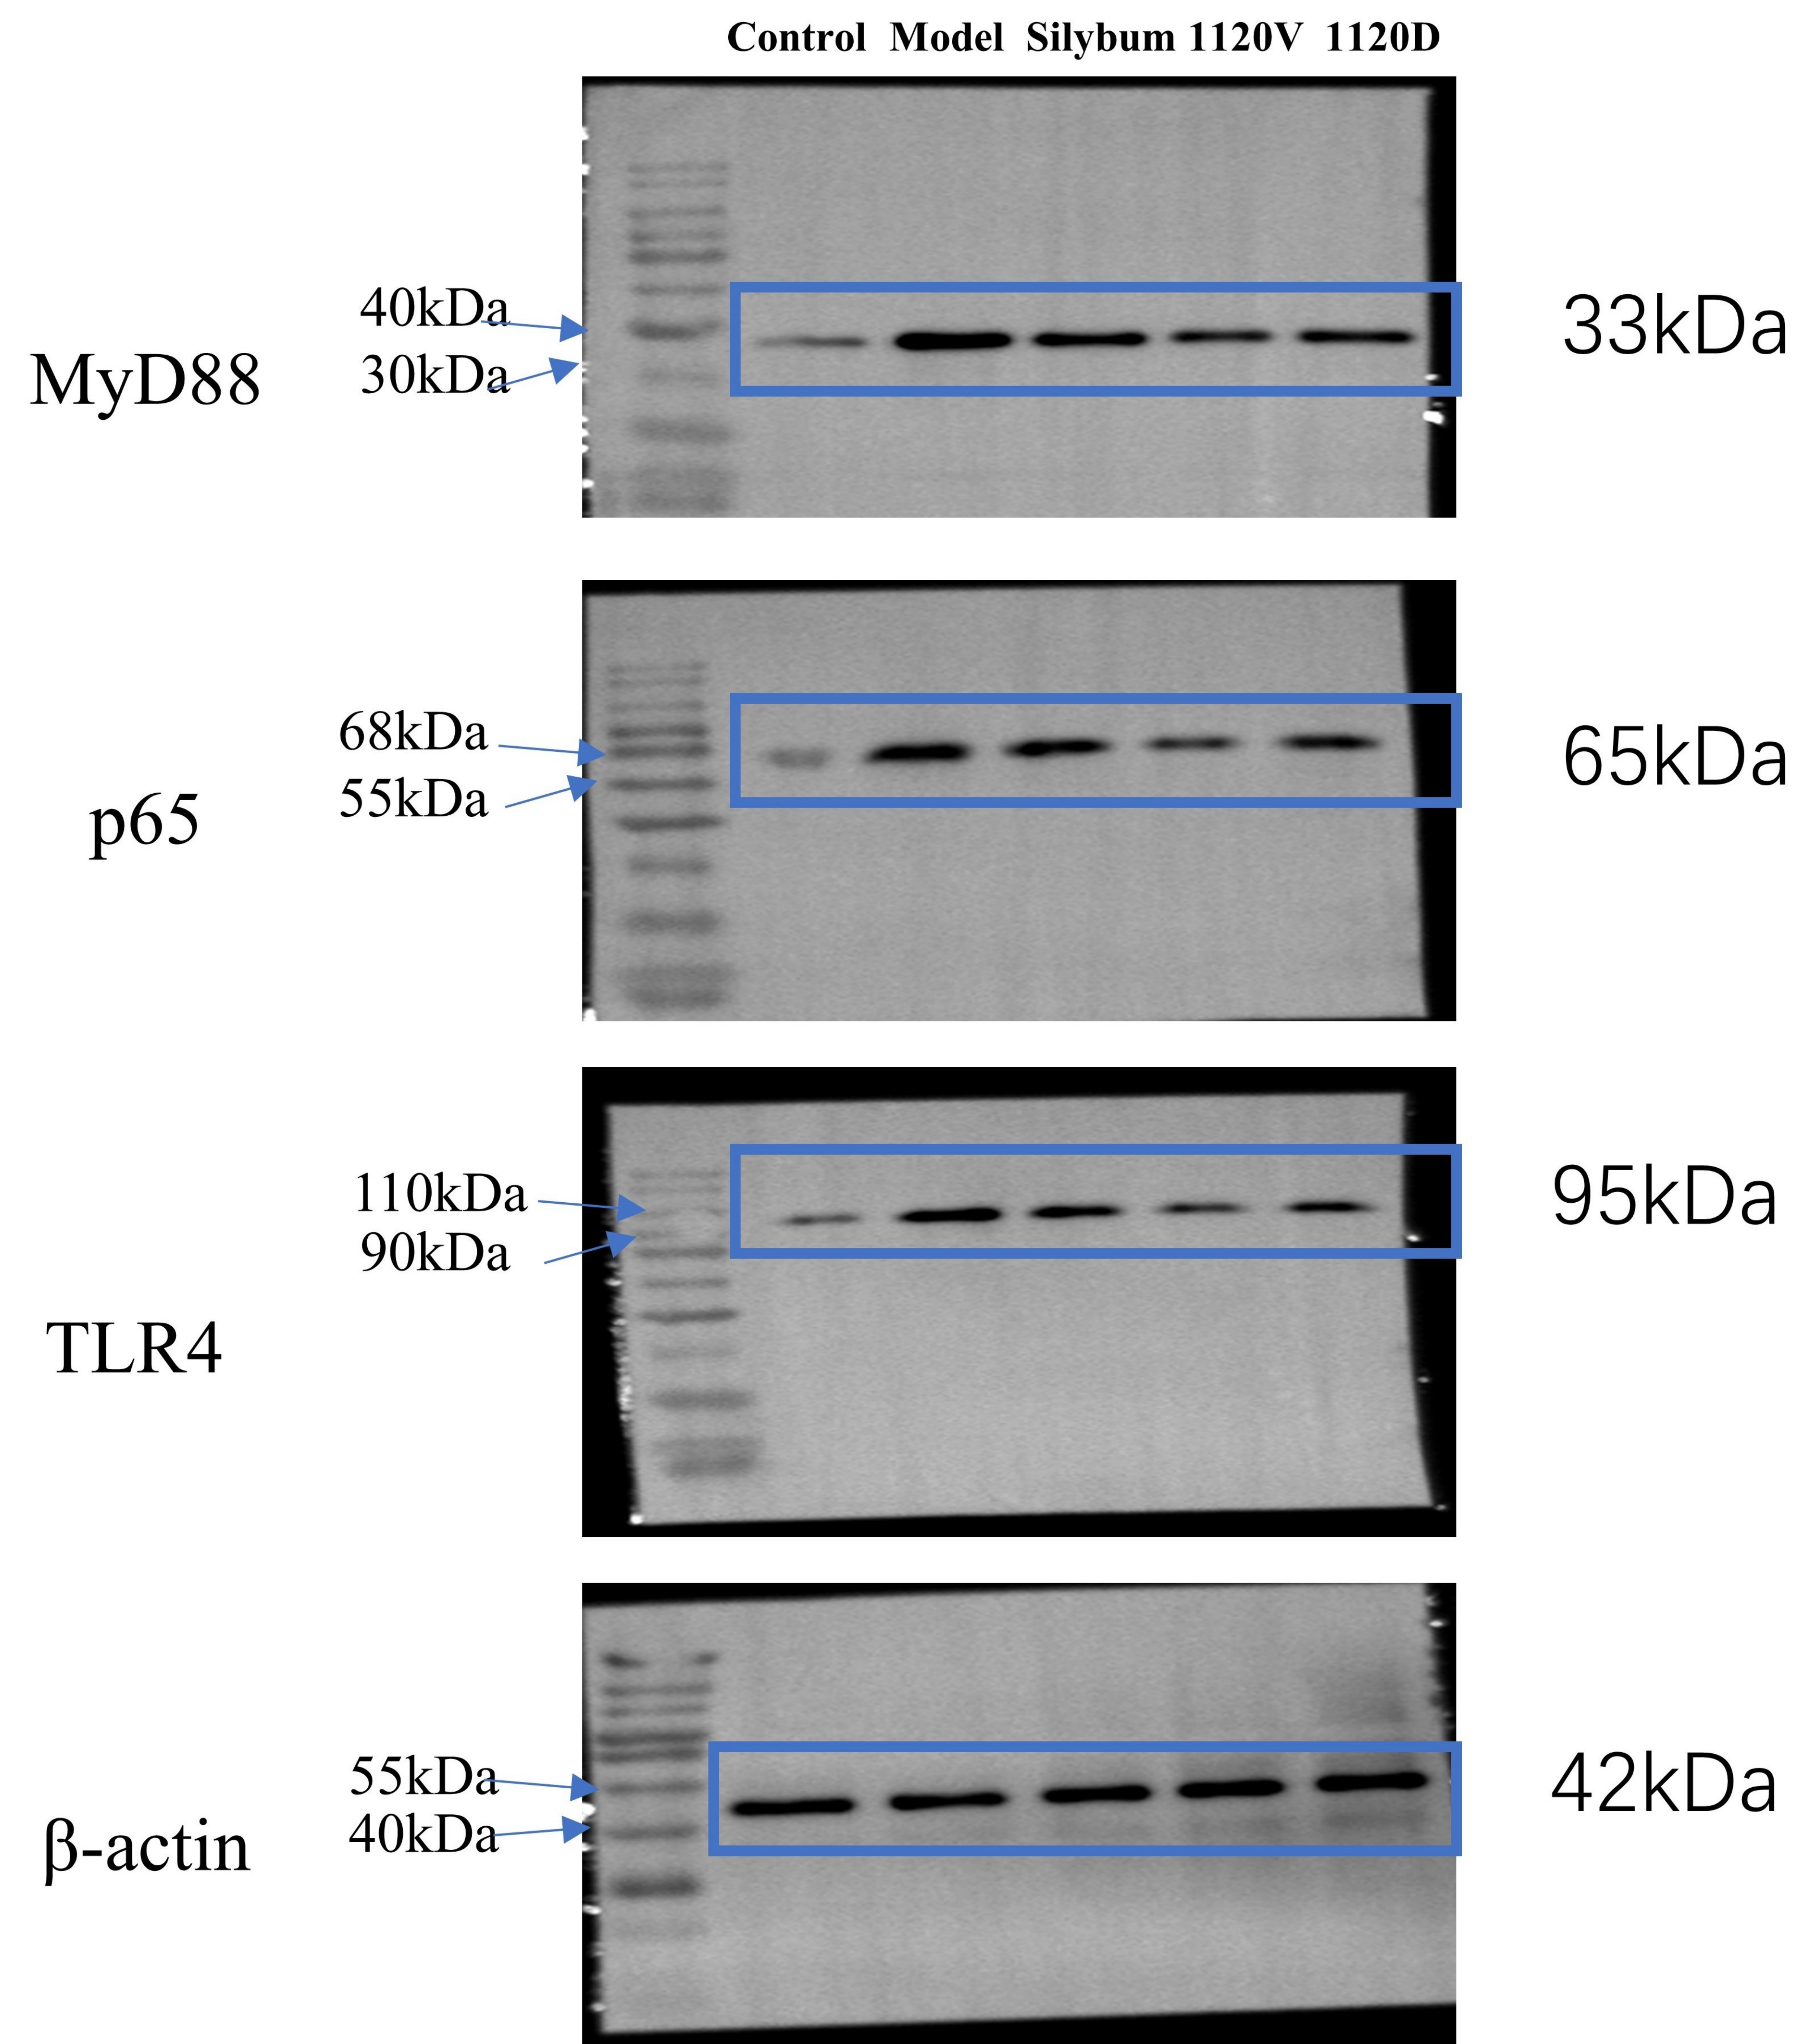

Supplement: d4fo02592j2.pdf [file d4fo02592j2.pdf]
